# Supplementary material for: LncRNA NEAT1 mediates intestinal inflammation by regulating TNFRSF1B
Source: PubMed Central journal article supplement — Ann Transl Med. 2021 May;9(9):773. doi: 10.21037/atm-21-34 (PMC8246228; doi:10.21037/atm-21-34), 2021-05
Supplement: atm-09-09-773-dss.pdf [file atm-09-09-773-dss.pdf]

## Data Sharing Statement

|                     |                                                                                                                                                     |                                                                                           |
|---------------------|-----------------------------------------------------------------------------------------------------------------------------------------------------|-------------------------------------------------------------------------------------------|
| <b>Article Info</b> | <a href="http://dx.doi.org/10.21037/atm-21-34">http://dx.doi.org/10.21037/atm-21-34</a>                                                             |                                                                                           |
| <b>Item</b>         | <b>Question</b>                                                                                                                                     | <b>Authors' Response<br/>(place "-" if not applicable)</b>                                |
| 1                   | Would you like to share data collected for your study to others?                                                                                    | Yes                                                                                       |
| 2                   | If not, would you like to share the reason for your decision?                                                                                       | -                                                                                         |
| 3                   | What data in particular will be shared?                                                                                                             | The target miRNAs of NEAT1 and the upstream miRNA of TNFRSF1B in supplementary materials. |
| 4                   | Any other documents will be shared? Such as study protocol, statistical analysis plan, informed consent form, clinical study report, analytic code. | Statistical plan will be shared if requested.                                             |
| 5                   | When will data availability begin?                                                                                                                  | From the publication date.                                                                |
| 6                   | When will data availability end?                                                                                                                    | One year within the publication date because data is updated very quickly these days.     |
| 7                   | To whom will you share the data?                                                                                                                    | Gastroenterologist who are also interested in the relationship between lncRNA and IBD.    |
| 8                   | For what type of analysis or purpose?                                                                                                               | For advancing current understanding of lncRNA in IBD.                                     |
| 9                   | How or where can the data/documents be obtained?                                                                                                    | Emails can be sent to 188311008@csu.edu.cn                                                |
| 10                  | Any other restrictions?                                                                                                                             | -                                                                                         |
