# Supplementary material for: LncRNA NEAT1 mediates intestinal inflammation by regulating TNFRSF1B
Source: PubMed Central journal article supplement — Ann Transl Med. 2021 May;9(9):773. doi: 10.21037/atm-21-34 (PMC8246228; doi:10.21037/atm-21-34), 2021-05
Supplement: atm-09-09-773-supplementary.pdf [file atm-09-09-773-supplementary.pdf]

**Table S1** RT-qPCR primers

| Gene                  | 5'-3'                   |
|-----------------------|-------------------------|
| <i>LncRNA-NEAT1-F</i> | CGCATTGTGTGTCTGGTTCA    |
| <i>LncRNA-NEAT1-R</i> | CTGCCACACGAAACCTTAC     |
| <i>TNFRSF1B-F</i>     | TGAAACATCAGACGTGGTGTG   |
| <i>TNFRSF1B-R</i>     | TGCAAATATCCGTGGATGAAGTC |
| <i>IL8-F</i>          | ACTGAGAGTGATTGAGAGTGGAC |
| <i>IL8-R</i>          | AACCCTCTGCACCCAGTTTTTC  |
| <i>MCP1-F</i>         | CAGCCAGATGCAATCAATGCC   |
| <i>MCP1-R</i>         | TGGAATCCTGAACCCACTTCT   |
| <i>β-actin-F</i>      | ACCCTGAAGTACCCCATCGAG   |
| <i>β-actin-R</i>      | AGCACAGCCTGGATAGCAAC    |
| <i>18S-F</i>          | CAGCCACCCGAGATTGAGCA    |
| <i>18S-R</i>          | TAGTAGCGACGGGCGGTGTG    |

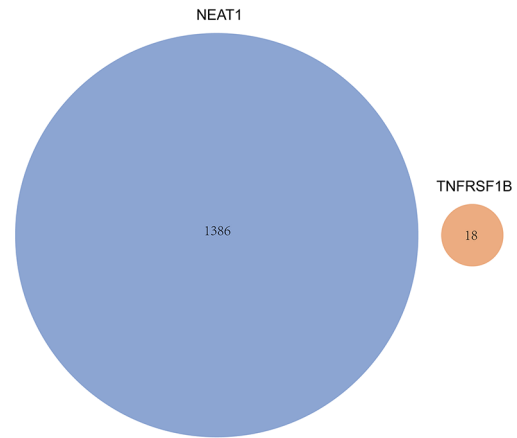

**Figure S2** There were no overlaps between the downstream candidate miRNAs of NEAT1 and the upstream regulatory miRNA of TNFRSF1B.

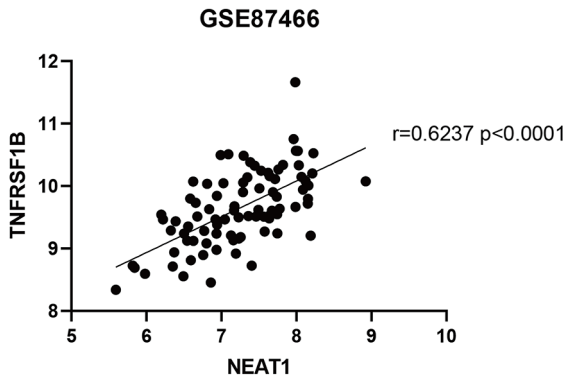

**Figure S1** Pearson correlation analysis was performed between NEAT1 and TNFRSF1B and showed that NEAT1 and TNFRSF1B are positively correlated.
